# Supplementary material for: Ancillary ligand-assisted structural diversity of six new MOFs with 5-(4-carboxybenzoylamino)-isophthalic acid: syntheses, crystal structures and photoluminescence properties
Source: Royal Society of Chemistry journal article supplement (doi:10.1039/c3ce40858b), 2013-01-01
Supplement: c3ce40858b.pdf [file c3ce40858b.pdf]

## Supplementary Information

**Ancillary ligand-assisted structural diversity of six new metal-organic frameworks with 5-(4-carboxybenzoylamino)-isophthalic acid: syntheses, crystal structures and photoluminescence properties**

**Wen Zhao<sup>a</sup>, Jie Han<sup>b,\*</sup>, Ge Tian<sup>c</sup>, Xiao-Li Zhao<sup>a,\*</sup>**

*<sup>a</sup>Shanghai Key Laboratory of Green Chemistry and Chemical Processes, Department of Chemistry, East China Normal University, 3663 North Zhongshan Road, Shanghai 200062, P. R. China. Fax: 86-21-62233179. Email: [xlzhao@chem.ecnu.edu.cn](mailto:xlzhao@chem.ecnu.edu.cn)*

*<sup>b</sup>School of Science & Technology, The Open University of Hong Kong, Kowloon, HongKong SAR, P. R. China. Email: [chan@ouhk.edu.hk](mailto:chan@ouhk.edu.hk)*

*<sup>c</sup>State Key Laboratory of Inorganic Synthesis and Preparative Chemistry, College of Chemistry, Jilin University, Changchun 130012, P.R. China*

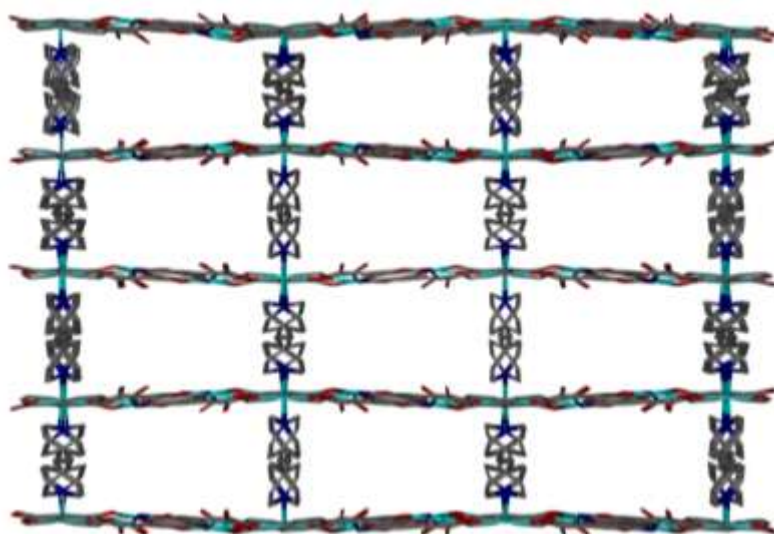

(a)

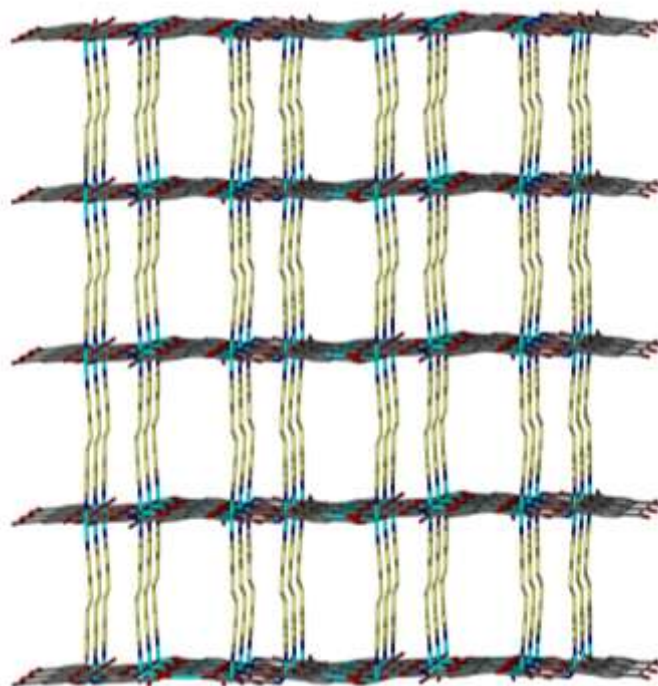

(b)

Fig. S1 (a) Bpe pillars *s* in **1**: (a) supporting the adjacent layers; (b) supporting the interval layers.

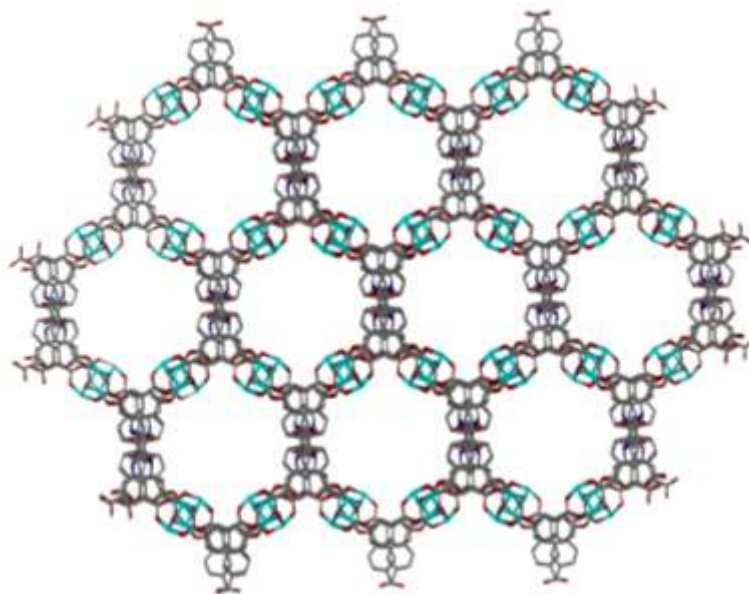

(a)

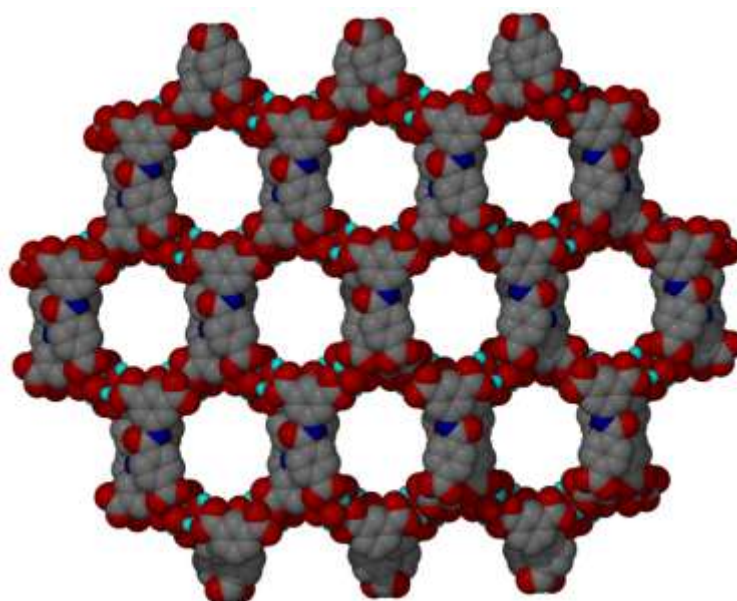

(b)

Fig. S2 Three-dimensional structure of **3** generated from Zn<sup>2+</sup> and L<sup>3</sup> ligands with 1D honeycomb-like channel viewed along the *c* axis: (a) in stick mode; (b) in Space-filling mode.

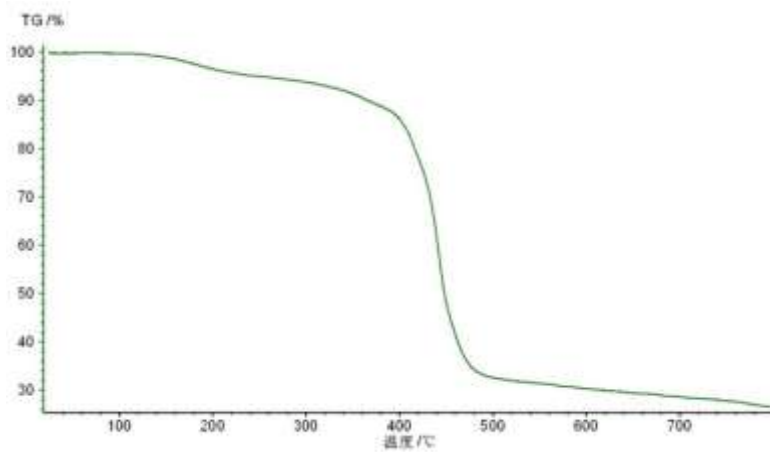

Fig. S3 TGA curve of  $[\text{Co}_3\text{L}_2(\text{bpe})_4] \cdot 2\text{DMF} \cdot 2\text{H}_2\text{O}$  (1).

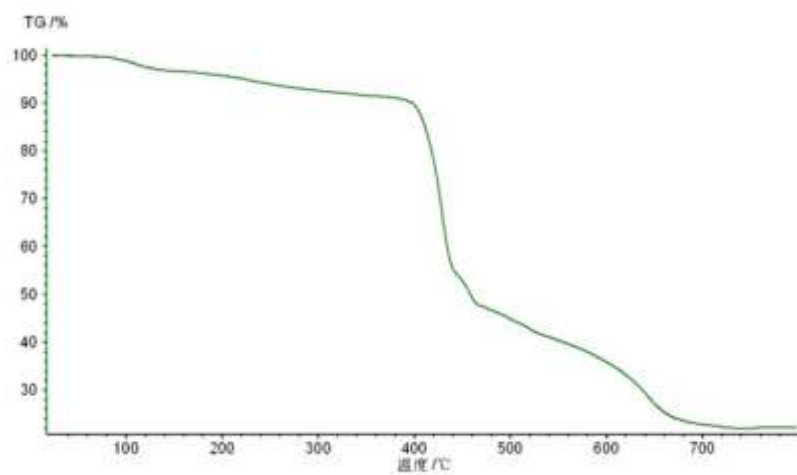

Fig. S4 TGA curve of  $[\text{Cd}_3\text{L}_2(\text{bpe})_4] \cdot 3\text{H}_2\text{O}$  (2).

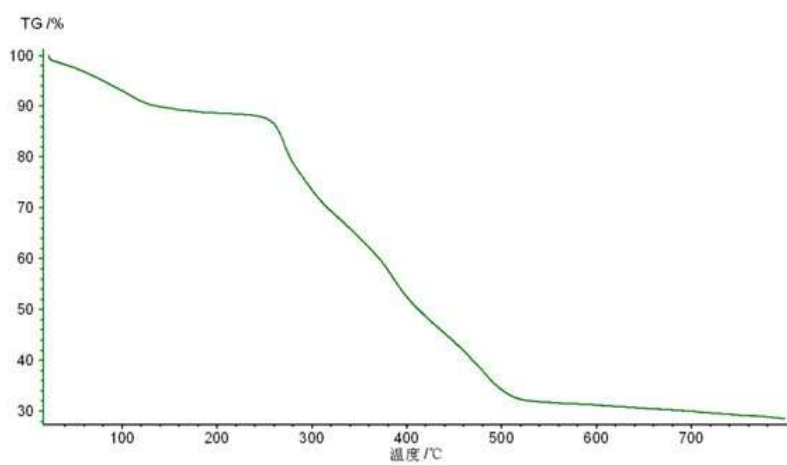

Fig. S5 TGA curve of  $[\text{Zn}_2\text{L}(\text{OH})(\text{bpe})] \cdot 5.5\text{H}_2\text{O}$  (**3**).

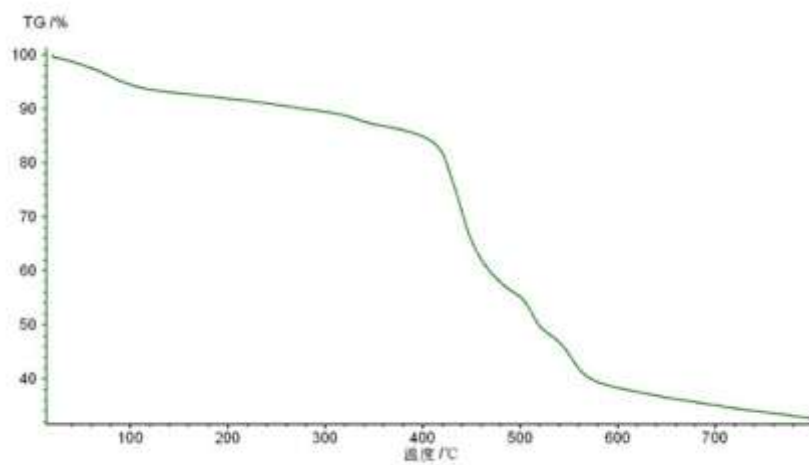

Fig. S6 TGA curve of  $[\text{Co}_7\text{L}_4(\text{bpa})_2(\text{OH})_2(\text{H}_2\text{O})_4] \cdot 4\text{H}_2\text{O}$  (**4**).

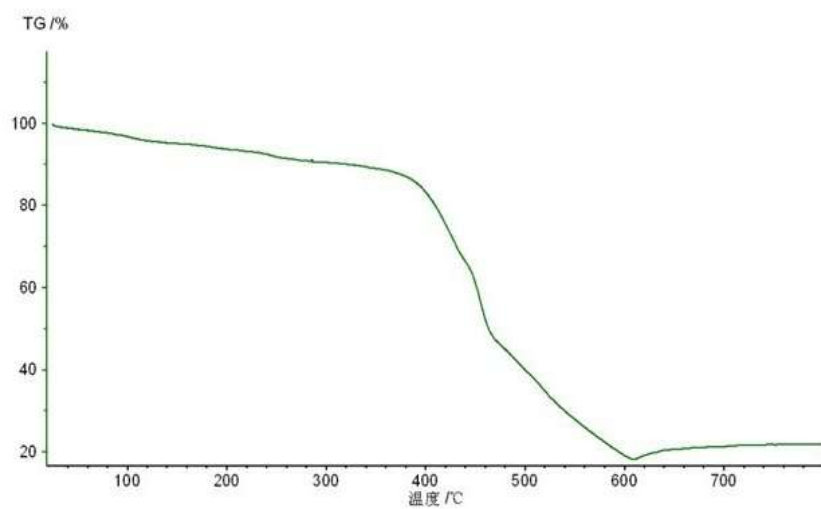

Fig. S7 TGA curve of Ni(HL)(bpa)(H<sub>2</sub>O) (5).



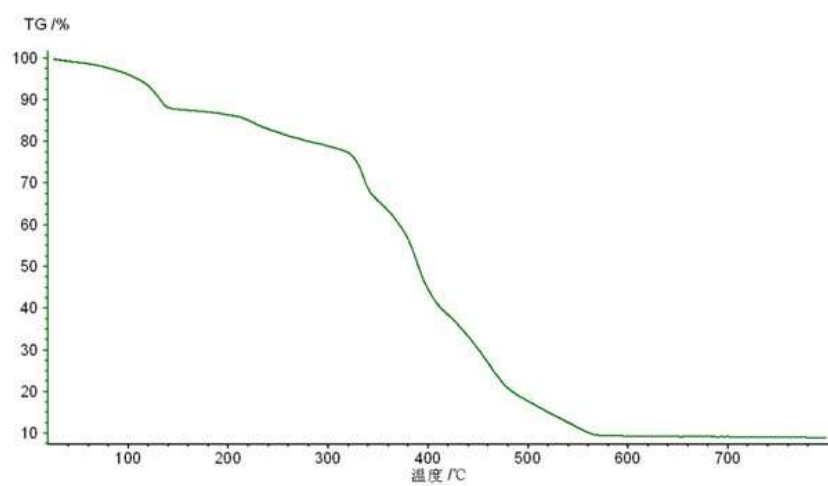

Fig. S8 TGA curve of  $[\text{Zn}_2(\text{HL})_2(\text{bpy})_2(\text{H}_2\text{O})_2] \cdot (\text{bpy}) \cdot 6\text{H}_2\text{O}$  (6).

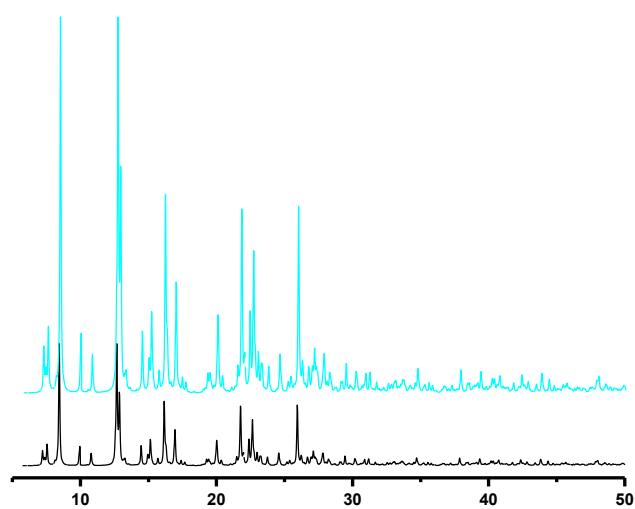

Fig. S9 PXR D patterns of the simulated (black), as-synthesized of **1** (turquoise).

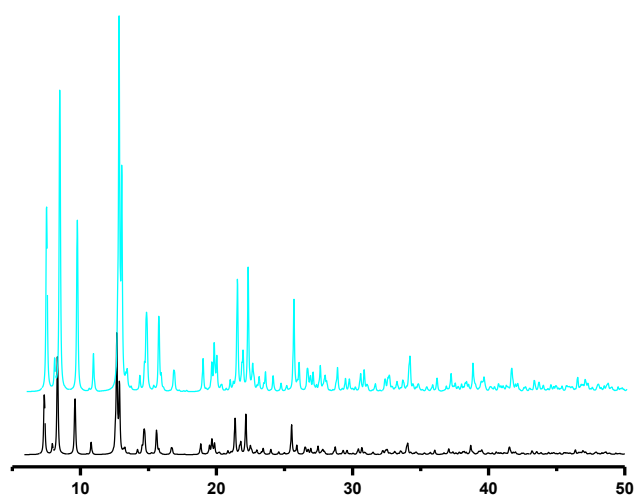

Fig. S10 PXR D patterns of the simulated (black), as-synthesized of **2** (turquoise).

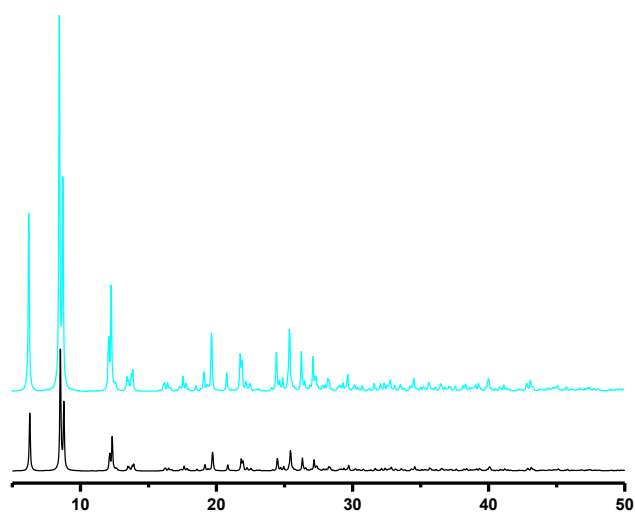

Fig. S11 PXR D patterns of the simulated (black), as-synthesized of **3** (turquoise).

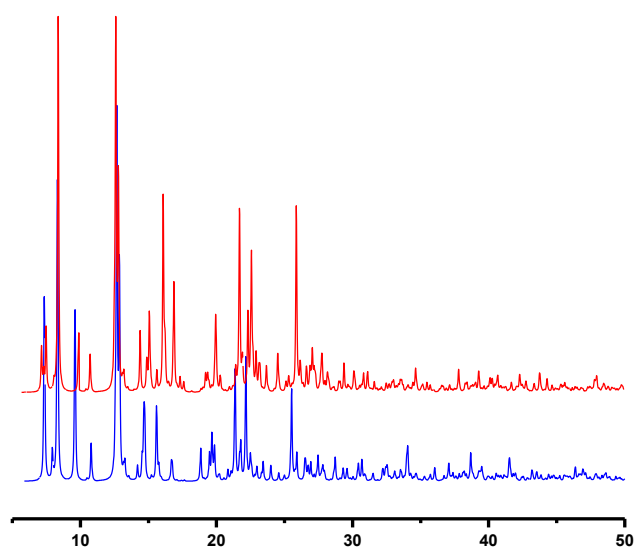

Fig. S12 PXR D patterns of **1**(red) and **2**(blue), indicating **1** and **2** are isostructural.

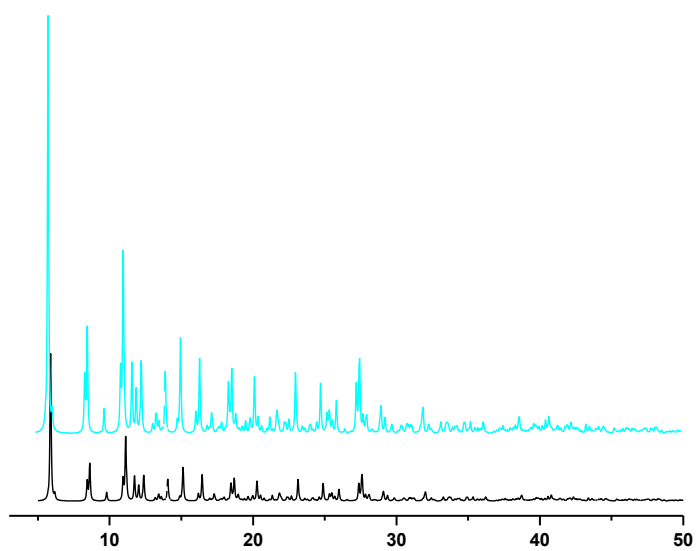

Fig. S13 PXR D patterns of the simulated (black), as-synthesized of **4** (turquoise).

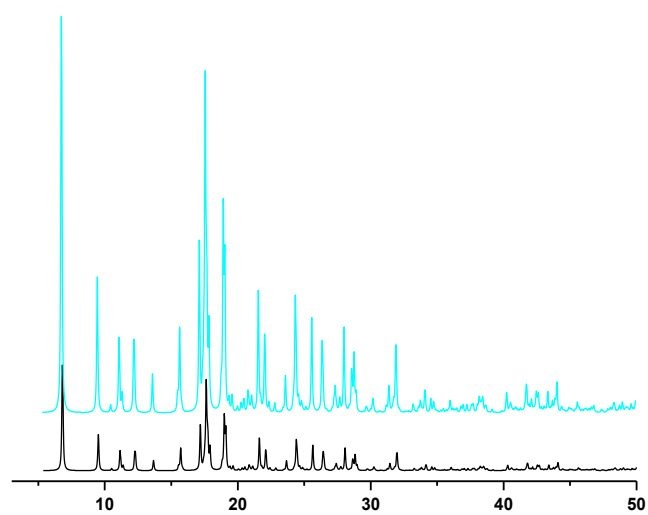

Fig. S14 PXRd patterns of the simulated (black), as-synthesized of **5** (turquoise).

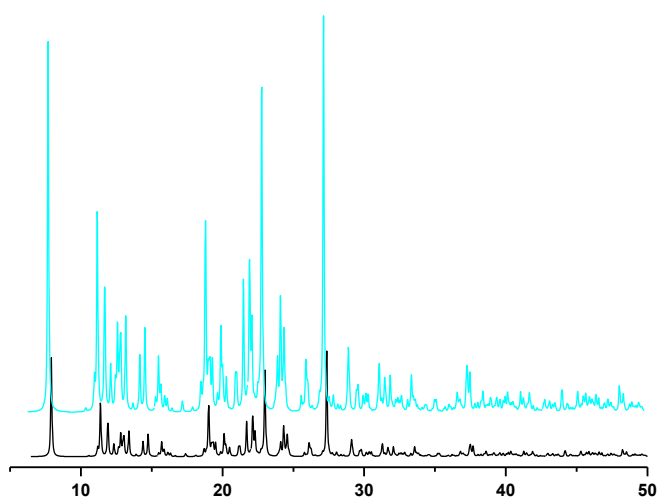

Fig. S15 PXR D patterns of the simulated (black), as-synthesized of **6** (turquoise).
